# Supplementary material for: Functional Connectivity of the Striatum as a Neural Correlate of Symptom Severity in Patient with Obsessive-Compulsive Disorder
Source: PubMed Central journal article supplement — Psychiatry Investig. 2020 Feb 3;17(2):87–95. doi: 10.30773/pi.2019.0206 (PMC7047004; doi:10.30773/pi.2019.0206), 2020-02-03
Supplement: pi-2019-0206-suppl1.pdf [file pi-2019-0206-suppl1.pdf]

**Supplementary Table 1.** Group comparisons of striatal functional connectivity between OCD patients and HCs before the Bonferroni correction

| Seed                               | Brain region                      | Cluster size<br>(voxels) | Connectivity strength |       | FDR-corrected p | MNI coordinates (mm) |     |     |
|------------------------------------|-----------------------------------|--------------------------|-----------------------|-------|-----------------|----------------------|-----|-----|
|                                    |                                   |                          | HC                    | OCD   |                 | x                    | y   | z   |
| Dorsal caudate<br>(right)          | OCD > HC                          | 141                      | -0.05                 | 0.10  | 0.042           | -6                   | 32  | -28 |
|                                    | Subcallosal/orbitofrontal cortex  |                          |                       |       |                 |                      |     |     |
| Dorsal caudate (left)              | OCD > HC                          | 145                      | -0.90                 | 0.04  | 0.036           | -58                  | -58 | 38  |
|                                    | Left angular gyrus                |                          |                       |       |                 |                      |     |     |
| Dorsal caudal<br>putamen (left)    | OCD > HC                          | 341                      | -0.10                 | 0.04  | <0.001          | 2                    | -76 | 4   |
|                                    | Right intracalcarine cortex       |                          |                       |       |                 |                      |     |     |
|                                    | Left cuneal cortex                | 119                      | -0.09                 | 0.04  | 0.028           | -2                   | -78 | 32  |
|                                    | HC > OCD                          | 192                      | 0.26                  | 0.11  | 0.004           | -28                  | 4   | 4   |
|                                    | Left putamen                      |                          |                       |       |                 |                      |     |     |
| Right putamen                      | 125                               | 0.34                     | 0.20                  | 0.027 | 28              | 2                    | 6   |     |
| Ventral rostral<br>putamen (right) | OCD > HC                          | 231                      | -0.02                 | 0.11  | 0.002           | 56                   | 18  | -6  |
|                                    | Right inferior frontal gyrus      |                          |                       |       |                 |                      |     |     |
|                                    | Left supramarginal gyrus          | 220                      | -0.05                 | 0.08  | 0.002           | -52                  | -42 | 32  |
|                                    | Right postcentral gyrus           | 187                      | -0.02                 | 0.12  | 0.004           | 60                   | -14 | 22  |
|                                    | Right supramarginal/angular gyrus | 160                      | -0.05                 | 0.09  | 0.004           | 68                   | -40 | 28  |
| Left temporal pole                 | 106                               | -0.02                    | 0.13                  | 0.049 | -54             | 14                   | -2  |     |

FDR: false discovery rate, MNI: Montreal Neurological Institute, OCD: obsessive-compulsive disorder, HCs: healthy controls
