# Supplementary material for: Functional Connectivity of the Striatum as a Neural Correlate of Symptom Severity in Patient with Obsessive-Compulsive Disorder
Source: PubMed Central journal article supplement — Psychiatry Investig. 2020 Feb 3;17(2):87–95. doi: 10.30773/pi.2019.0206 (PMC7047004; doi:10.30773/pi.2019.0206), 2020-02-03
Supplement: pi-2019-0206-suppl2.pdf [file pi-2019-0206-suppl2.pdf]

**Supplementary Table 2.** Previous literatures investigating cortico-striatal functional connectivity using striatal seeds in patients with obsessive-compulsive disorder

| Author                       | Year | Number of subjects (patients/controls) | Age (years) | Duration of illness (years)* | Y-BOCS     |
|------------------------------|------|----------------------------------------|-------------|------------------------------|------------|
| Harrison et al. <sup>1</sup> | 2009 | 21/21                                  | 26.2±3.4    | 8.7±5.7                      | -          |
| Sakai et al. <sup>2</sup>    | 2011 | 20/23                                  | 30.9±9.3    | -                            | 24.6±5.71  |
| Harrison et al. <sup>3</sup> | 2013 | 74/74                                  | 33.1±8.3    | 11.5±9.4                     | 21.8±6.3   |
| Posner et al. <sup>4</sup>   | 2014 | 23/20                                  | 30.9±8.8    | 14.8*                        | 25.9±4.2   |
| Chen et al. <sup>5</sup>     | 2016 | 30/30                                  | 26.23±5.69  | 5.54±4.04                    | 23.77±6.85 |
| Vaghi et al. <sup>6</sup>    | 2017 | 44/43                                  | 37.5±12.1   | 12.11±9.44                   | 22±4.2     |

\*duration of illness was estimated by subtracting average age of onset from average age. Y-BOCS: Yale-Brown Obsessive Compulsive Scale

## REFERENCES

1. Harrison BJ, Soriano-Mas C, Pujol J, Ortiz H, López-Solà M, Hernández-Ribas R, et al. Altered corticostriatal functional connectivity in obsessive-compulsive disorder. *Arch Gen Psychiatry* 2009;66:1189-1200.
2. Sakai Y, Narumoto J, Nishida S, Nakamae T, Yamada K, Nishimura T, Fukui K. Corticostriatal functional connectivity in non-medicated patients with obsessive-compulsive disorder. *Eur Psychiatry* 2011;26:463-469.
3. Harrison BJ, Pujol J, Cardoner N, Deus J, Alonso P, López-Solà M, et al. Brain corticostriatal systems and the major clinical symptom dimensions of obsessive-compulsive disorder. *Biol Psychiatry* 2013;73:321-328.
4. Posner J, Marsh R, Maia TV, Peterson BS, Gruber A, Simpson HB. Reduced functional connectivity within the limbic cortico-striato-thalamo-cortical loop in unmedicated adults with obsessive-compulsive disorder. *Hum Brain Mapp* 2014;35:2852-2860.
5. Chen Y, Juhás M, Greenshaw AJ, Hu Q, Meng X, Cui H, et al. Abnormal resting-state functional connectivity of the left caudate nucleus in obsessive-compulsive disorder. *Neurosci Lett* 2016;623:57-62.
6. Vaghi MM, Vértes PE, Kitzbichler MG, Apergis-Schoute AM, van der Flier FE, Fineberg NA, et al. Specific frontostriatal circuits for impaired cognitive flexibility and goal-directed planning in obsessive-compulsive disorder: evidence from resting-state functional connectivity. *Biol Psychiatry* 2017;81:708-717.
